# Supplementary material for: Machine learning-driven identification of drugs inhibiting cytochrome P450 2C9
Source: PubMed Central journal article supplement (PMC8820617; doi:10.1371/journal.pcbi.1009820), 2022-01-26
Supplement: pcbi.1009820.s002.pdf [file pcbi.1009820.s002.pdf]

## Details of analytical method for inhibition tests using CYP2C9 supersomes and calculation of IC<sub>50</sub>

| Test compound concentrations: | Test compound | Test concentrations (µM)                                     |
|-------------------------------|---------------|--------------------------------------------------------------|
|                               | Abemaciclib   | 0.3, 1, 3, 10, 20 and 30 µM<br>10, 30, 50, 60, 70 and 80 µM  |
|                               | Sertindole    | 0.3, 1, 3, 10, 20 and 30 µM<br>10, 30, 60, 70, 90 and 100 µM |
|                               | Asapiprant    | 0.3, 1, 3, 10, 20 and 30 µM<br>10, 30, 60, 70, 90 and 100 µM |
|                               | Tarafenacin   | 0.3, 1, 3, 10, 20 and 30 µM<br>10, 30, 60, 70, 90 and 100 µM |
|                               | Duvelisib     | 0.3, 1, 3, 10, 20 and 30 µM<br>10, 30, 60, 70, 90 and 100 µM |
|                               | Dasatinib     | 0.3, 1, 3, 10, 20 and 30 µM<br>10, 30, 60, 70, 90 and 100 µM |
|                               | Cloperidone   | 0.3, 1, 3, 10, 20 and 30 µM                                  |
|                               | Vatalanib     | 0.3, 1, 3, 10, 20 and 30 µM                                  |
|                               | Ticagrelor    | 0.3, 1, 3, 10, 20 and 30 µM                                  |
|                               | Piriqualone   | 0.3, 1, 3, 10, 20 and 30 µM                                  |

Substrates and concentrations:

Diclofenac at 5 µM for CYP2C9

Instrumentation: Waters Acquity UPLC + Thermo TSQ Endura triple quadrupole MS

Software: XCalibur 4.0

### Calculations

The IC<sub>50</sub> value for the test compound was determined by fitting following equation to the data

$$A\% = \frac{Top - Bottom}{1 + 10^{(Log[I] - LogIC_{50})}} + Bottom$$

A% = percentual activity remaining

Top = the upper plateau of percentual activity (constrained to 100)

Bottom = the lower plateau of percentual activity (constrained to 0)

[I] = inhibitor concentration

IC<sub>50</sub> = inhibitor concentration, where the remaining activity is 50%

Software: GraphPad prism 8.02
