# Supplementary material for: Machine learning-driven identification of drugs inhibiting cytochrome P450 2C9
Source: PubMed Central journal article supplement (PMC8820617; doi:10.1371/journal.pcbi.1009820), 2022-01-26
Supplement: pcbi.1009820.s003.pdf [file pcbi.1009820.s003.pdf]

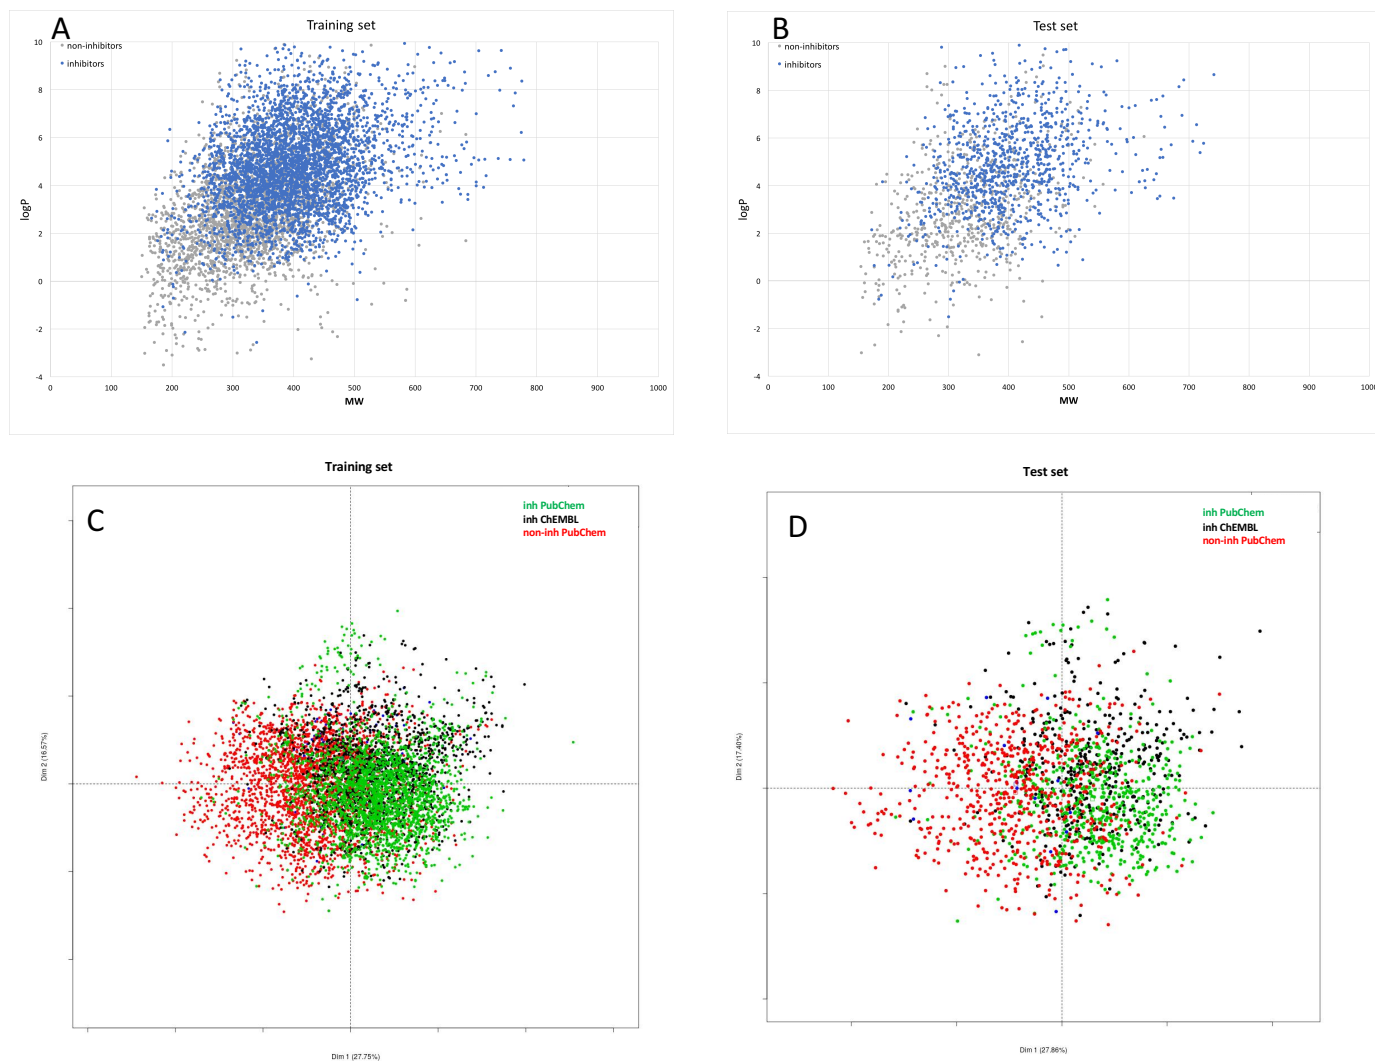

**Figure S1.** Chemical space of the training and external test sets. A. Comparison of logP and molecular weight (MW) values of the training set' inhibitors and non-inhibitors. B. Comparison of logP and MW values of the test set' inhibitors and non-inhibitors. C. PCA of the training set' inhibitors and non-inhibitors. D. PCA of the test set' inhibitors and non-inhibitors.
