# Supplementary material for: Machine learning-driven identification of drugs inhibiting cytochrome P450 2C9
Source: PubMed Central journal article supplement (PMC8820617; doi:10.1371/journal.pcbi.1009820), 2022-01-26
Supplement: pcbi.1009820.s005.pdf [file pcbi.1009820.s005.pdf]

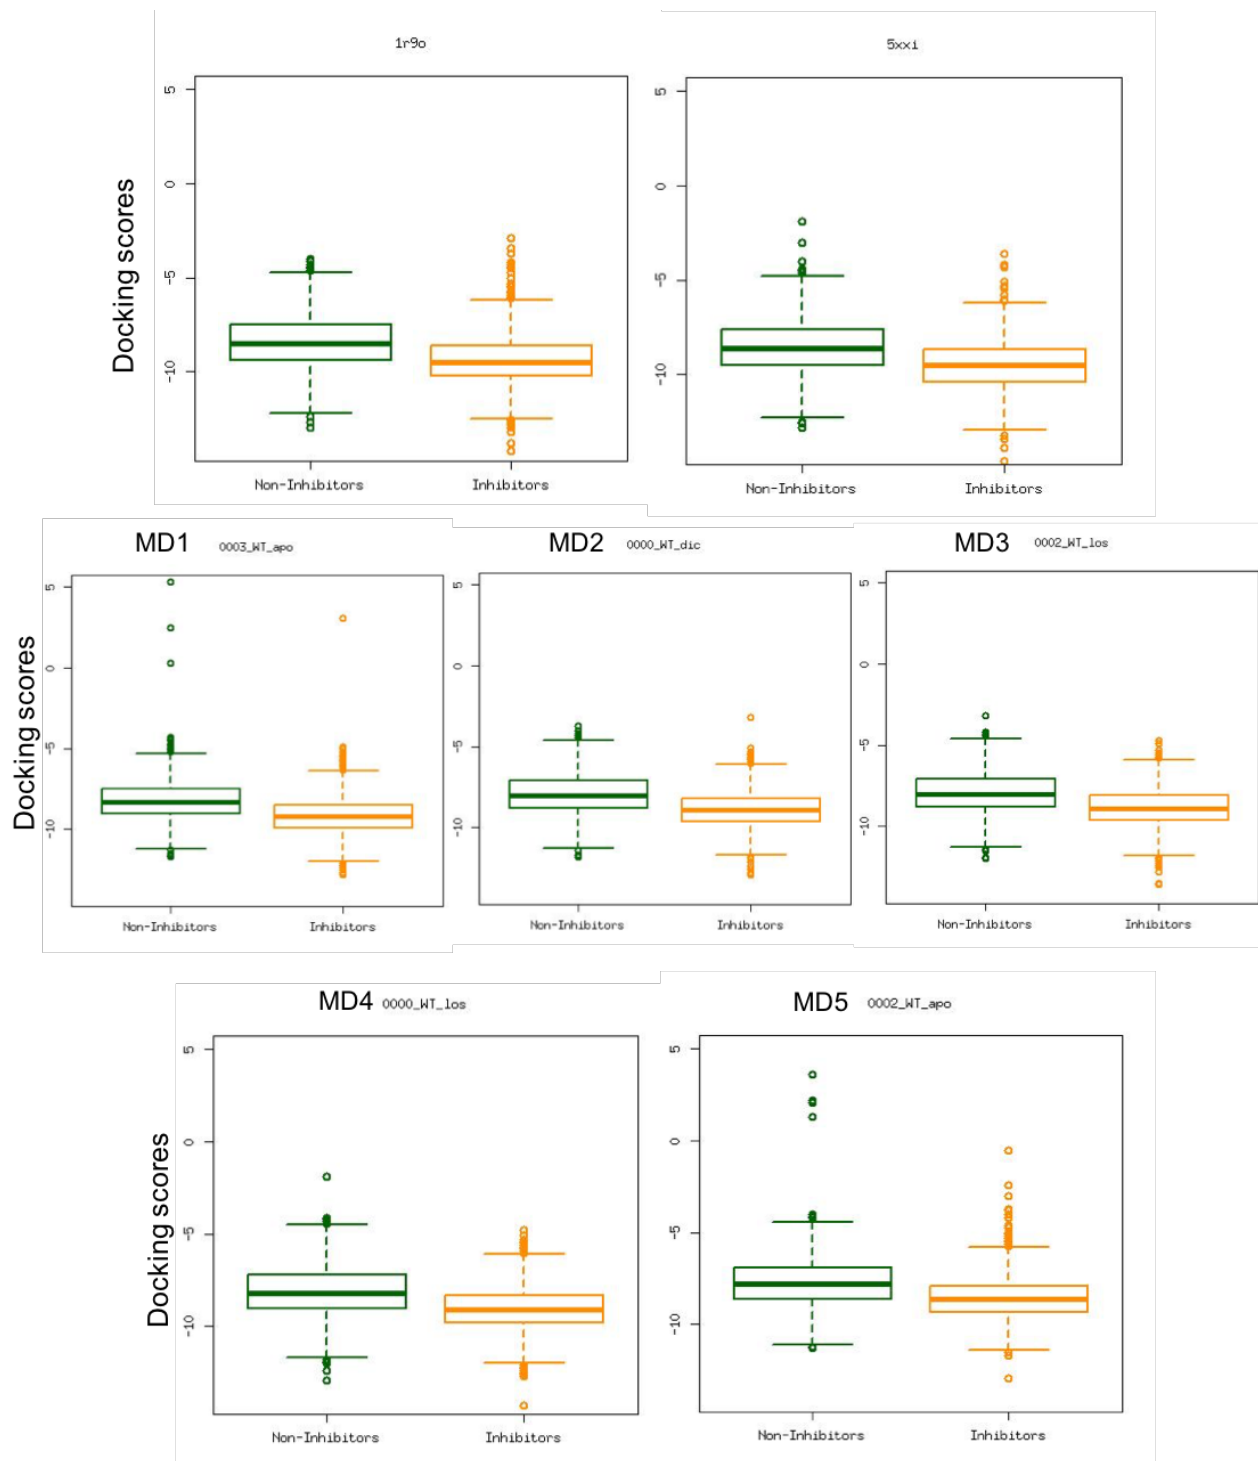

**Figure S3.** Autodock Vina scores of the training set' inhibitors and non-inhibitors calculated on seven different CYP2C9 conformations.
