# Supplementary material for: Machine learning-driven identification of drugs inhibiting cytochrome P450 2C9
Source: PubMed Central journal article supplement (PMC8820617; doi:10.1371/journal.pcbi.1009820), 2022-01-26
Supplement: pcbi.1009820.s006.pdf [file pcbi.1009820.s006.pdf]

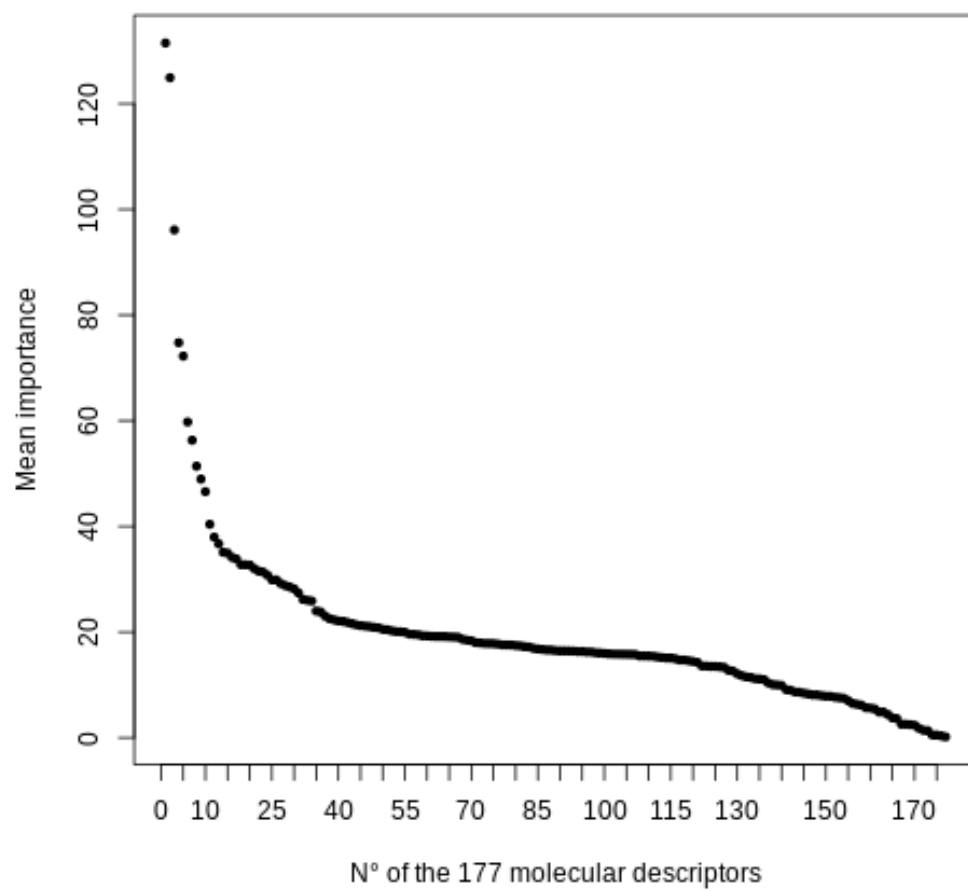

**Figure S4.** Mean importance inferred from the random forest modeling of the 177 molecular descriptors used to train models for CYP2C9 prediction.
