# Supplementary material for: Machine learning-driven identification of drugs inhibiting cytochrome P450 2C9
Source: PubMed Central journal article supplement (PMC8820617; doi:10.1371/journal.pcbi.1009820), 2022-01-26
Supplement: pcbi.1009820.s007.pdf [file pcbi.1009820.s007.pdf]

**A**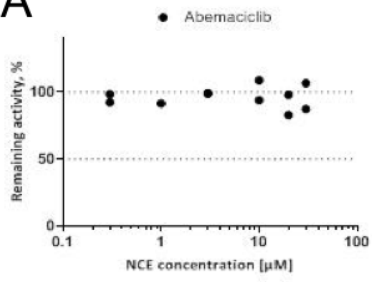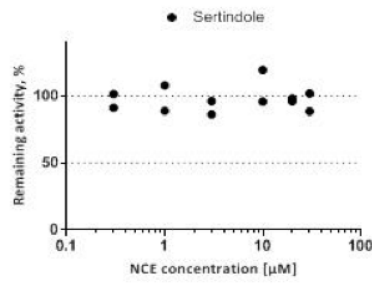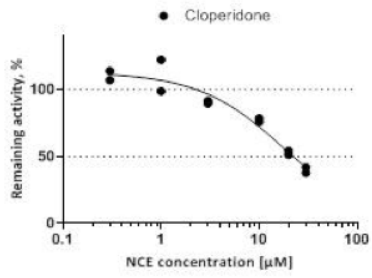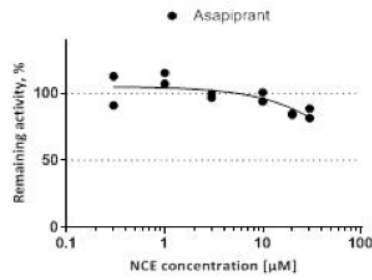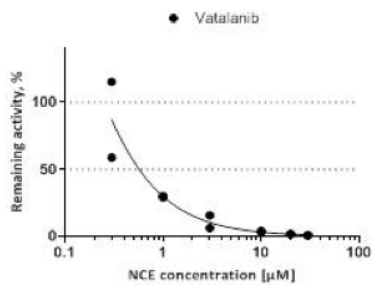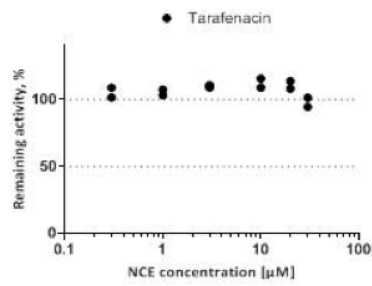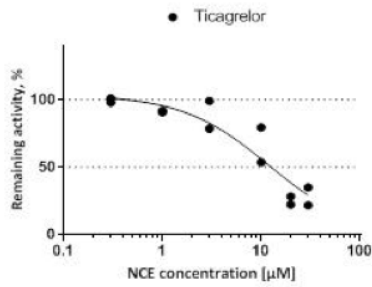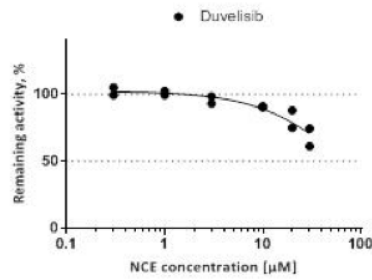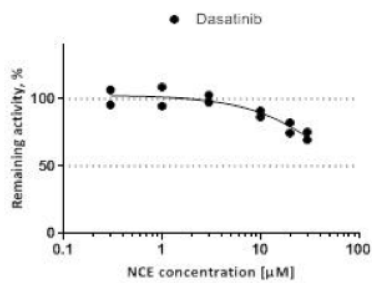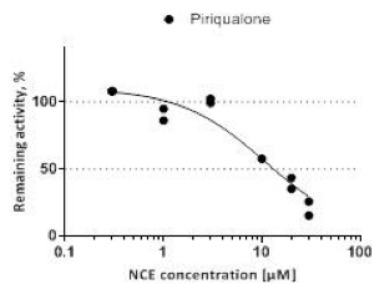

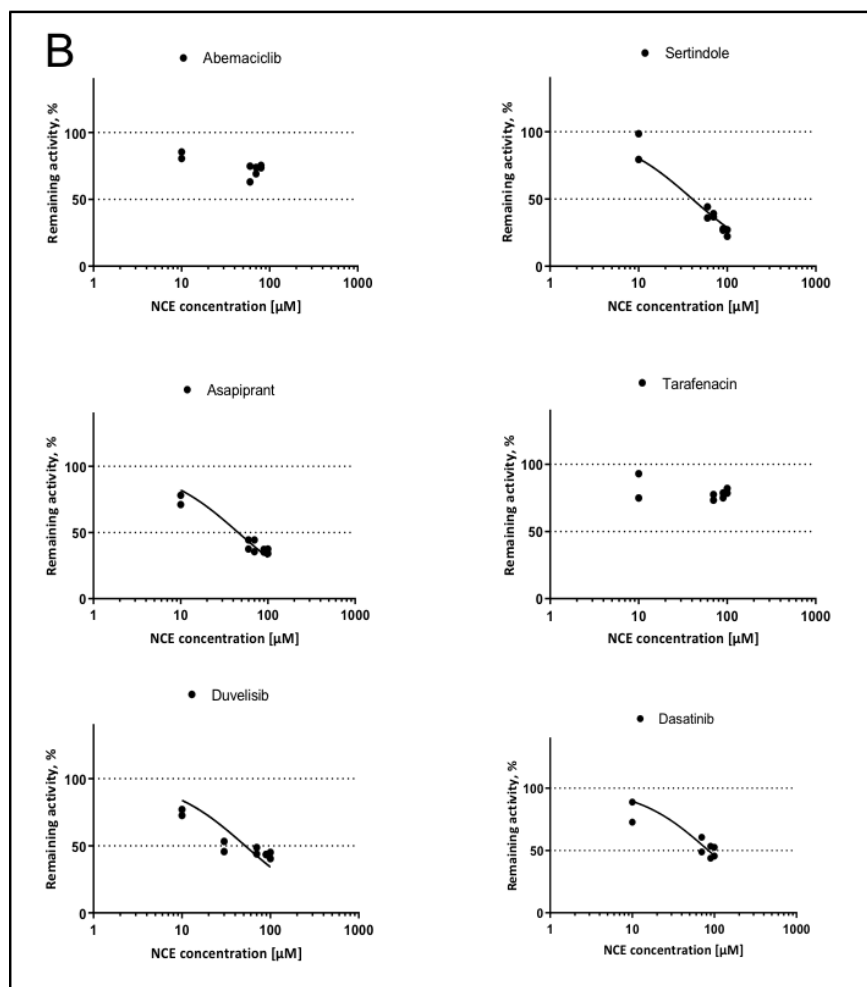

**Figure S5.** Kinetics of inhibition observed for the studied compounds with CYP2C9 supersomes. Two independent experiments were done. A The test concentration ranged from 0.3 to 30  $\mu\text{M}$ . B The test concentration ranged from 10 to 100  $\mu\text{M}$ .
