# Supplementary material for: Machine learning-driven identification of drugs inhibiting cytochrome P450 2C9
Source: PubMed Central journal article supplement (PMC8820617; doi:10.1371/journal.pcbi.1009820), 2022-01-26
Supplement: pcbi.1009820.s008.pdf [file pcbi.1009820.s008.pdf]

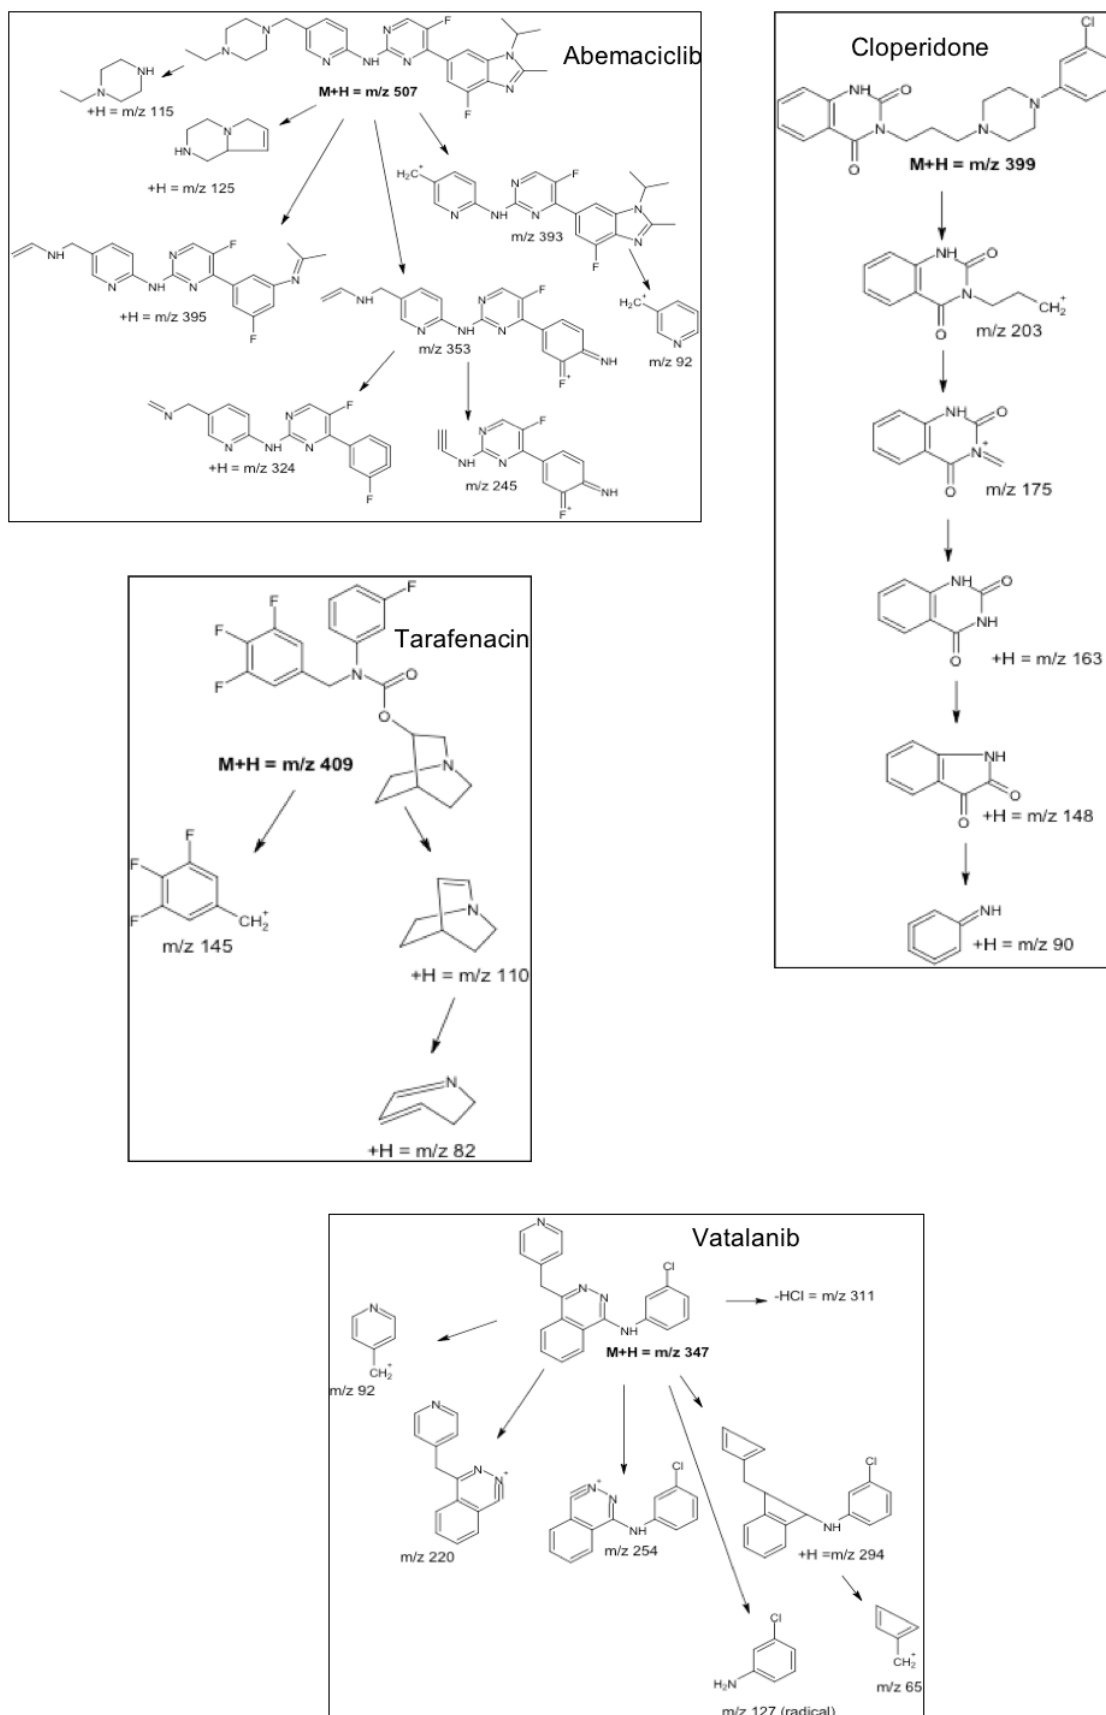

**Figure S6.** Metabolism assays using CYP2C9 supersomes for the identification of CYP2C9-produced metabolites. MS/MS fragment ion identification was used for the parent.
