# Supplementary material for: Machine learning-driven identification of drugs inhibiting cytochrome P450 2C9
Source: PubMed Central journal article supplement (PMC8820617; doi:10.1371/journal.pcbi.1009820), 2022-01-26
Supplement: pcbi.1009820.s009.pdf [file pcbi.1009820.s009.pdf]

**Table S1. Mean importance inferred from the random forest modeling of the best 36 physicochemical descriptors and 7 IEs discriminating between inhibitors and non-inhibitors of CYP2C9.**

| Categories                                  | Descriptor name | Description                                                                                                | Importance |
|---------------------------------------------|-----------------|------------------------------------------------------------------------------------------------------------|------------|
| <i>MOE 2D<br/>molecular<br/>descriptors</i> |                 |                                                                                                            |            |
| Lipophilicity                               | SlogP           | log of the octanol/water partition coefficient                                                             | 131.48     |
|                                             | h_logD          | log of the octanol/water partition coefficient at pH 7                                                     | 124.92     |
|                                             | logP(o/w)       | log of the octanol/water partition coefficient (including implicit hydrogens)                              | 96.11      |
|                                             | BCUT_SLOGP_0    | BCUT# descriptor using atomic contribution to logP                                                         | 56.31      |
|                                             | GCUT_SLOGP_0    | GCUT& descriptor using atomic contribution to logP                                                         | 35.10      |
|                                             | GCUT_SLOGP_2    | GCUT& descriptor using atomic contribution to logP                                                         | 26.20      |
|                                             | SlogP_VSA9      | van der Waals surface area for atoms contributing to SlogP >0.40                                           | 21.84      |
|                                             | SlogP_VSA3      | van der Waals surface area for atoms contributing to SlogP within [0,0.1]                                  | 21.62      |
| Polarity                                    | PEOE_VSA_NEG    | total negative van der Waals surface area calculated using partial charges calculated with the PEOE method | 72.22      |
|                                             | PEOE_VSA-1      | van der Waals surface of atoms with charge in the range [-0.10,-0.05) calculated with the PEOE method      | 32.02      |
|                                             | PEOE_VSA_FNEG   | fractional negative van der Waals surface area calculated using the PEOE method                            | 29.88      |
|                                             | Q_VSA_FNEG      | fractional negative van der Waals surface area calculated using the partial charges                        | 25.88      |

|                                        |               |                                                                                                   |       |
|----------------------------------------|---------------|---------------------------------------------------------------------------------------------------|-------|
|                                        |               | stored with each structure in the database                                                        |       |
|                                        | Q_VSA_FPPOS   | fractional positive polar van der Waals surface area                                              | 24.00 |
| Charges                                | BCUT_PEOE_0   | BCUT descriptor using PEOE partial charges                                                        | 46.58 |
|                                        | BCUT_PEOE_3   | BCUT descriptor using PEOE partial charges                                                        | 34.95 |
|                                        | GCUT_PEOE_0   | GCUT descriptor using PEOE partial charges                                                        | 31.54 |
|                                        | BCUT_PEOE_2   | BCUT descriptor using PEOE partial charges                                                        | 22.10 |
| Atom types and bounds                  | h_log_pbo     | sum of log (1+pi bond order) for all bonds based on a modified Hueckel Theory calculation         | 74.77 |
|                                        | a_aro         | number of aromatic atoms                                                                          | 51.38 |
|                                        | balabanJ      | Balaban's connectivity topological index                                                          | 23.82 |
| Molar refractivity                     | SMR_VSA_5     | accessible van der Waals surface area for atoms with Molar Refractivity in the range [0.44,0.485] | 34.15 |
|                                        | GCUT_SMR_0    | GCUT descriptor using atomic contribution to molar refractivity                                   | 31.37 |
|                                        | GCUT_SMR_2    | GCUT descriptor using atomic contribution to molar refractivity                                   | 28.54 |
| Functional descriptor<br>Rule of three | ast_violation | Astex Fragment-like Violation Count                                                               | 37.97 |
| <i>MOE 3D molecular descriptors</i>    |               |                                                                                                   |       |
| Volume and shape, packing              | pmi1          | first diagonal element of diagonalized moment of inertia tensor                                   | 40.39 |
|                                        | vsurf_R       | surface rugosity                                                                                  | 36.70 |
|                                        | std_dim2      | the square root of the second largest eigenvalue covariance                                       | 23.04 |

|                                         |          |                                                                          |       |
|-----------------------------------------|----------|--------------------------------------------------------------------------|-------|
|                                         |          | matrix of the atomic coordinates                                         |       |
|                                         | vsurf_CP | critical packing parameter                                               | 22.03 |
| Conformation dependent negative surface | ASA-     | water accessible surface area of all atoms with negative partial charges | 59.75 |
|                                         | CASA-    | negative charge weighted surface area                                    | 32.68 |
| Potential energy                        | E_oop    | out-of-plane potential energy                                            | 48.95 |
|                                         | E_ang    | angle bend potential energy                                              | 32.78 |
|                                         | AM1_E    | the total SCF energy calculated using the MOPAC AM1 Hamiltonian          | 28.81 |
|                                         | E_str    | bond stretch potential energy                                            | 27.43 |
|                                         | E        | potential energy                                                         | 22.53 |
| Interaction energies (IE)               | IE1      | IE computed on MD1                                                       | 33.84 |
|                                         | IE2      | IE computed on MD2                                                       | 32.75 |
|                                         | IE3      | IE computed on 1R90                                                      | 30.79 |
|                                         | IE4      | IE computed on MD3                                                       | 29.89 |
|                                         | IE5      | IE computed on 5XXI                                                      | 28.20 |
|                                         | IE6      | IE computed on MD4                                                       | 26.03 |
|                                         | IE7      | IE computed on MD5                                                       | 22.32 |

#The BCUT descriptors [1] were calculated from the eigenvalues of a modified adjacency matrix (e.g., the diagonal takes PEOE partial charges or atomic contribution to logP). Each  $ij$  entry of the adjacency matrix takes the value of  $1/\sqrt{b_{ij}}$ , where  $b_{ij}$  is the formal bond order between bonded atoms  $i$  and  $j$ .

&The GCUT descriptors were calculated from the eigenvalues of a modified graph distance adjacency matrix (e.g., the diagonal takes PEOE partial charges or atomic contribution to logP). The MD structures correspond to MD simulations of CYP2C9 apo, CYP2C9 bound to diclofenac, or CYP2C9 bound to losartan: MD1, 0003\_apo; MD2, 0000\_diclofenac; MD3, 0002\_losartan; MD4, 0000\_losartan; and MD5, 0002\_WT\_apo.

## References

1. Pearlman RS, Smith KM. Novel software tools for chemical diversity. Perspectives in Drug Discovery and Design. 1998; 9:339–353
