# Supplementary material for: Machine learning-driven identification of drugs inhibiting cytochrome P450 2C9
Source: PubMed Central journal article supplement (PMC8820617; doi:10.1371/journal.pcbi.1009820), 2022-01-26
Supplement: pcbi.1009820.s010.pdf [file pcbi.1009820.s010.pdf]

**Table S2.** Performances of preliminary RF models with the best MOE descriptors on the training set.

| <b>Descriptors</b>         | 10 MOE | 15 MOE | 20 MOE | 30 MOE | 40 MOE |
|----------------------------|--------|--------|--------|--------|--------|
| <b>Balanced accuracy %</b> | 72.27  | 75.57  | 78.61  | 79.43  | 77.80  |
| <b>Sensitivity %</b>       | 77.45  | 75.46  | 79.82  | 81.57  | 78.98  |
| <b>Specificity %</b>       | 67.08  | 75.67  | 77.39  | 77.29  | 76.62  |
