# Supplementary material for: Machine learning-driven identification of drugs inhibiting cytochrome P450 2C9
Source: PubMed Central journal article supplement (PMC8820617; doi:10.1371/journal.pcbi.1009820), 2022-01-26
Supplement: pcbi.1009820.s011.pdf [file pcbi.1009820.s011.pdf]

**Table S3. Parameters of the optimized best RF and SVM models.**

| <b>Best models</b>     | 15 MOE<br>+7 IE<br>descriptors | 20 MOE<br>+7 IE<br>descriptors | 36 MOE<br>+7 IE<br>descriptors | 170 MOE<br>+7 IE<br>descriptors |
|------------------------|--------------------------------|--------------------------------|--------------------------------|---------------------------------|
| <b>RF <i>n</i>tree</b> | 250                            | 300                            | 275                            | 275                             |
| <b>RF <i>m</i>try</b>  | 7                              | 7                              | 11                             | 9                               |
| <b>SVM Cost</b>        | 8                              | 4                              | 8                              | 4                               |
| <b>SVM Sigma</b>       | 0.0452                         | 0.0348                         | 0.0203                         | 0.0036                          |
