# Supplementary material for: Machine learning-driven identification of drugs inhibiting cytochrome P450 2C9
Source: PubMed Central journal article supplement (PMC8820617; doi:10.1371/journal.pcbi.1009820), 2022-01-26
Supplement: pcbi.1009820.s012.pdf [file pcbi.1009820.s012.pdf]

**Table S4.** Performances of the optimized RF and SVM models with MOE descriptors on the external validation set.

| <b>Descriptors</b> | <b>Models</b> | <b>Accuracy %</b> | <b>Sensitivity %</b> | <b>Specificity %</b> | <b>MCC %</b> |
|--------------------|---------------|-------------------|----------------------|----------------------|--------------|
| 15 MOE             | RF            | 83.16             | 86.66                | 78.65                | 67.36        |
|                    | SVM           | 82.49             | 86.76                | 76.97                | 65.89        |
| 20 MOE             | RF            | 83.39             | 86.56                | 79.30                | 68.27        |
|                    | SVM           | 82.09             | 86.26                | 76.71                | 68.11        |
| 36 MOE             | RF            | 83.95             | 87.06                | 79.95                | 69.47        |
|                    | SVM           | 82.66             | 87.36                | 76.58                | 66.52        |
| 170 MOE            | RF            | 84.18             | 87.96                | 79.30                | 70.85        |
|                    | SVM           | 84.75             | 88.47                | 79.95                | 70.32        |
