# Supplementary material for: Machine learning-driven identification of drugs inhibiting cytochrome P450 2C9
Source: PubMed Central journal article supplement (PMC8820617; doi:10.1371/journal.pcbi.1009820), 2022-01-26
Supplement: pcbi.1009820.s013.pdf [file pcbi.1009820.s013.pdf]

**Table S5.** Comparison of datasets used and performances of models as reported in the literature.

| Models                                  | Validation                   | Balanced accuracy % | Sensitivity %  | Specificity %  | MCC %          | Number of inhibitors/non-inhibitors |
|-----------------------------------------|------------------------------|---------------------|----------------|----------------|----------------|-------------------------------------|
| Cheng et al. [1]<br><i>Model CC-III</i> | Training CV<br>External set  | 74.25<br>76.10      | 63.90<br>56.20 | 84.60<br>96.00 | 49.60<br>59.20 | 4369/7761<br>609/1970               |
| Li et al. [2]<br><i>Multitask model</i> | Training set<br>External set | 84.20<br>71.05      | 80.80<br>52.20 | 87.60<br>89.90 | 65.80<br>36.50 | 2552/6833<br>69/596                 |
| Wu et al. [3]<br><i>XGBoost model</i>   | Training set<br>External set | 83.15<br>63.15      | 73.30<br>29.00 | 93.00<br>97.30 | 68.00<br>35.40 | 2552/6833<br>69/596                 |
| Racz et al. [4]<br><i>Model 1</i>       | Training CV<br>External set  | 80.50<br>79.00      | 82.00<br>82.00 | 79.00<br>76.00 | 0.61<br>0.48   | 6488/7617<br>2209/2593              |
| <b>RF</b><br><b>36 MOE + 7 IE</b>       | Training CV<br>External set  | 82.45<br>84.33      | 89.13<br>89.97 | 75.76<br>78.69 | 65.96<br>69.45 | 3872/2641<br>968/660                |
| <b>SVM</b><br><b>36 MOE + 7 IE</b>      | Training CV<br>External set  | 81.41<br>83.35      | 87.68<br>89.87 | 75.13<br>76.83 | 63.62<br>67.72 | 3872/2641<br>968/660                |

## References

1. Cheng F, Yu Y, Shen J, Yang L, Li W, Liu G, et al. Classification of cytochrome P450 inhibitors and noninhibitors using combined classifiers. *J Chem Inf Model* 2011;51:996–1011.
2. Li X, Xu Y, Lai L, Pei J. Prediction of human cytochrome P450 inhibition using a multitask deep autoencoder neural network. *Mol Pharm* 2018;15:4336–45.
3. Wu Z, Lei T, Shen C, Wang Z, Cao D, Hou T. ADMET evaluation in drug discovery. 19. Reliable prediction of human cytochrome P450 inhibition using artificial intelligence approaches. *J Chem Inf Model*. 2019;59:4587–601.
4. Racz A, Keseru GM. Large-scale evaluation of cytochrome P450 2C9 mediated drug interaction potential with machine learning-based consensus modeling. *J Comput Aided Mol Des*. 2020;34:831-9.
