# Supplementary material for: Machine learning-driven identification of drugs inhibiting cytochrome P450 2C9
Source: PubMed Central journal article supplement (PMC8820617; doi:10.1371/journal.pcbi.1009820), 2022-01-26
Supplement: pcbi.1009820.s014.pdf [file pcbi.1009820.s014.pdf]

**Table S6. List of the experimentally tested drugs.**

| Diversity Cluster | Drug         | Structure                                                                           | ZINC entry Provider                           |
|-------------------|--------------|-------------------------------------------------------------------------------------|-----------------------------------------------|
| 1                 | Abemaciclib  | 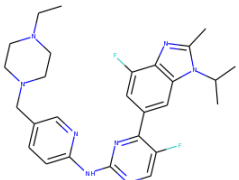   | ZINC000072318121<br>CliniSciences, France     |
| 2                 | Mizolastine  |    | ZINC000013831810<br>Bertin Bioreagent, France |
| 3                 | Sertindole   |    | ZINC000000538337<br>CliniSciences, France     |
| 3                 | Cloperidone  |   | ZINC000004215426<br>Ambinter, France          |
| 5                 | Sivelestat   |  | ZINC000021298097<br>Bertin Bioreagent, France |
| 6                 | Asapiprant   |  | ZINC000115250035<br>CliniSciences, France     |
| 7                 | Pf-562671    |  | ZINC000034638188<br>Bertin Bioreagent, France |
| 8                 | Ciltoprazine |  | ZINC000004215333<br>BOC Sciences, NY, USA     |

|    |              |                                                                                     |                                               |
|----|--------------|-------------------------------------------------------------------------------------|-----------------------------------------------|
| 10 | Vatalanib    | 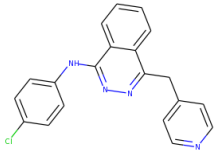   | ZINC00000007460<br>Sigma Aldrich, France      |
| 11 | Entinostat   |    | ZINC00000148870<br>Bertin Bioreagent, France  |
| 12 | Azd3514      |    | ZINC000101673084<br>Bertin Bioreagent, France |
| 14 | Muraglitazar |    | ZINC000049650290<br>Bertin Bioreagent, France |
| 16 | Bifeprofen   |   | ZINC000031502465<br>BOC Sciences, NY, USA     |
| 22 | Tarafenacin  |  | ZINC000000593626<br>CliniSciences, France     |
| 23 | Ticagrelor   |  | ZINC000028957444<br>Bertin Bioreagent, France |
| 24 | Duvelisib    |  | ZINC000088346058<br>Bertin Bioreagent, France |
| 24 | Dasatinib    |  | ZINC000003986735<br>CliniSciences, France     |
| 24 | Piriqualone  |  | ZINC000004217322<br>Mcule, Hungary            |
